# Supplementary material for: Effectiveness of a Breastfeeding Program for Mothers Returning to Work in Japan: a quasi-experiment study
Source: Research Square preprint supplement (doi:10.21203/rs.3.rs-34598/v3), 2020-11-18
Supplement: Supplementary file 1 [file 01b83dc25f65f219d2e18e96.xlsx]

## Sheet: Table4 
Table 4 Logistic regression analysis for breastfeeding continuation in the program group 3 months after returning to work
Variables		B	Adjusted odds ratioa	95%CI	P value
Program intervention	Yes	1.54	4.68	1.57- 13.96	0.006
	No
Maternal age		0.18	1.2	1.02- 1.40	0.03
Timing of return to work postpartum		-0.16	0.85	0.69-1.06	0.15
Working hours per day		-0.35	0.7	0.42-1.17	0.70
Education status	University or college graduate	1.44	4.24	0.58-30.97	0.16
	Junior or high school graduate
Previous breastfeeding experience	Yes	0.44	1.56	0.49-4.94	0.45
	No
Partner's support in child care	Yes	-1.50	0.22	0.05-1.44	0.12
	No
Presense of a peer to assist with breastfeeding	Yes	-0.01	1	0.22-3.93	0.99
	No
Consultation with midwives	Yes	0.04	1.56	0.46-5.31	0.48
	No
CI: confidence interval
aBinary logistic regression was adjusted for the variables included in this table.
