# Supplementary material for: Effectiveness of a Breastfeeding Program for Mothers Returning to Work in Japan: a quasi-experiment study
Source: Research Square preprint supplement (doi:10.21203/rs.3.rs-34598/v3), 2020-11-18
Supplement: Supplementary file 2 [file fa9eb78ce03c27249fa4bb38.xlsx]

## Sheet: Table2
Table 2 Participant characteristics of breastfeeding after returning to work
Variables		Program group (n=48)	Pamphlet group (n=46)	Control group (n=47)	P value
Timing of return to work postpartum (months)a, mean (SD)		9.3 (2.6)	9.9 (2.3)	8.8 (2.5)	0.09
Working hours per daya, mean (SD)		7.0 (1.1)	7.3 (1.2)	6.9 (1.0)	0.23
Partner's support in child careb
	Yes	45 (93.8)	43 (93.5)	40 (85.1)	0.30
	No	3 (6.3)	3 (6.5)	7 (14.9)
Presence of a peer to assist with breastfeedingc, n (%)
	Yes	40 (83.3)	41 (89.1)	37 (78.7)	0.40
	No	8 (16.7)	5 (10.9)	10 (21.3)
Consultation with midwives before and after returning to workc, n (%)
	Yes	17 (35.4)	22 (47.8)	10 (21.3)	0.03
	No	31 (64.6)	24 (52.2)	37 (78.7)
Feeding a baby expressed milk at daycarec, n (%)
	Yes	22 (45.8)	18 (39.1)	20 (42.6)	0.81
	No or unknown	26 (54.2)	28 (60.9)	27 (57.4)
Lactation room at workplace, n (%)
	Yes	2 (4.2)	3 (6.5)	1 (2.1)
	Secured a lactation room by herself	23 (47.9)	21 (45.7)	10 (21.3)
	No	23 (47.9)	22 (47.8)	35 (74.5)
	Work at home	0 (0.0)	0 (0.0)	1 (2.1)
Milk expression breaks at workplace, n (%)
	Secured	3 (6.3)	4 (8.7)	3 (6.4)
	Secured break by herself	36 (75.0)	25 (54.3)	13 (27.7)
	Breaks not secured or unknown	9 (18.8)	17 (26.1)	29 (61.7)
	No answer	0 (0.0)	0 (0.0)	2 (4.3)
Refrigerator to store breast milk, n (%)
	Yes	29 (60.4)	27 (58.7)	12 (25.5)
	No	19 (39.6)	19 (41.3)	31 (66.0)
	No answer	0 (0.0)	0 (0.0)	4 (8.5)
a One-way analysis of variance, bFisher's exact test, c Chi-square test.
